# Supplementary material for: An integrated photoanode based on non-critical raw materials for robust solar water splitting
Source: Royal Society of Chemistry journal article supplement (doi:10.1039/d0ma00355g), 2020-01-01
Supplement: d0ma00355g1.pdf [file d0ma00355g1.pdf]

## Supporting Information

### An Integrated Photoanode Based on Non-Critical Raw Materials for Robust Solar Water Splitting

Drialys Cardenas-Morcoso,<sup>1</sup> Miguel García Tecedor,<sup>1</sup> Tsvetelina Merdzhanova,<sup>2</sup>  
Vladimir Smirnov,<sup>2</sup> Friedhelm Finger,<sup>2</sup> Bernhard Kaiser,<sup>3</sup> Wolfram Jaegermann,<sup>3</sup> Sixto  
Gimenez<sup>1\*</sup>

<sup>1</sup> Institute of Advanced Materials (INAM), Universitat Jaume I, Avenida de Vicent Sos Baynat, s/n, 12006 Castelló de la Plana, Castellón, Spain;

<sup>2</sup> IEK-5 Photovoltaik, Forschungszentrum Jülich, Jülich, 52425, Germany;

<sup>3</sup> Institute of Materials Science, TU Darmstadt, Darmstadt, 64287, Germany

Corresponding author: [sjulia@uji.es](mailto:sjulia@uji.es)

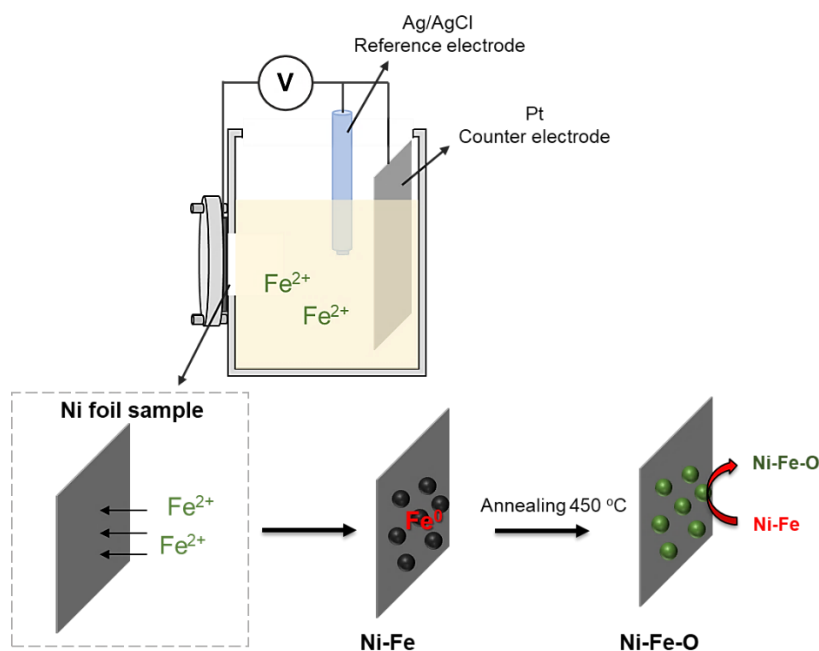

**Figure S11.** Preparation of the Ni-Fe electrocatalyst by electrodeposition of metallic Fe on Ni foil, followed by thermal annealing to form the mixed Ni-Fe oxide.

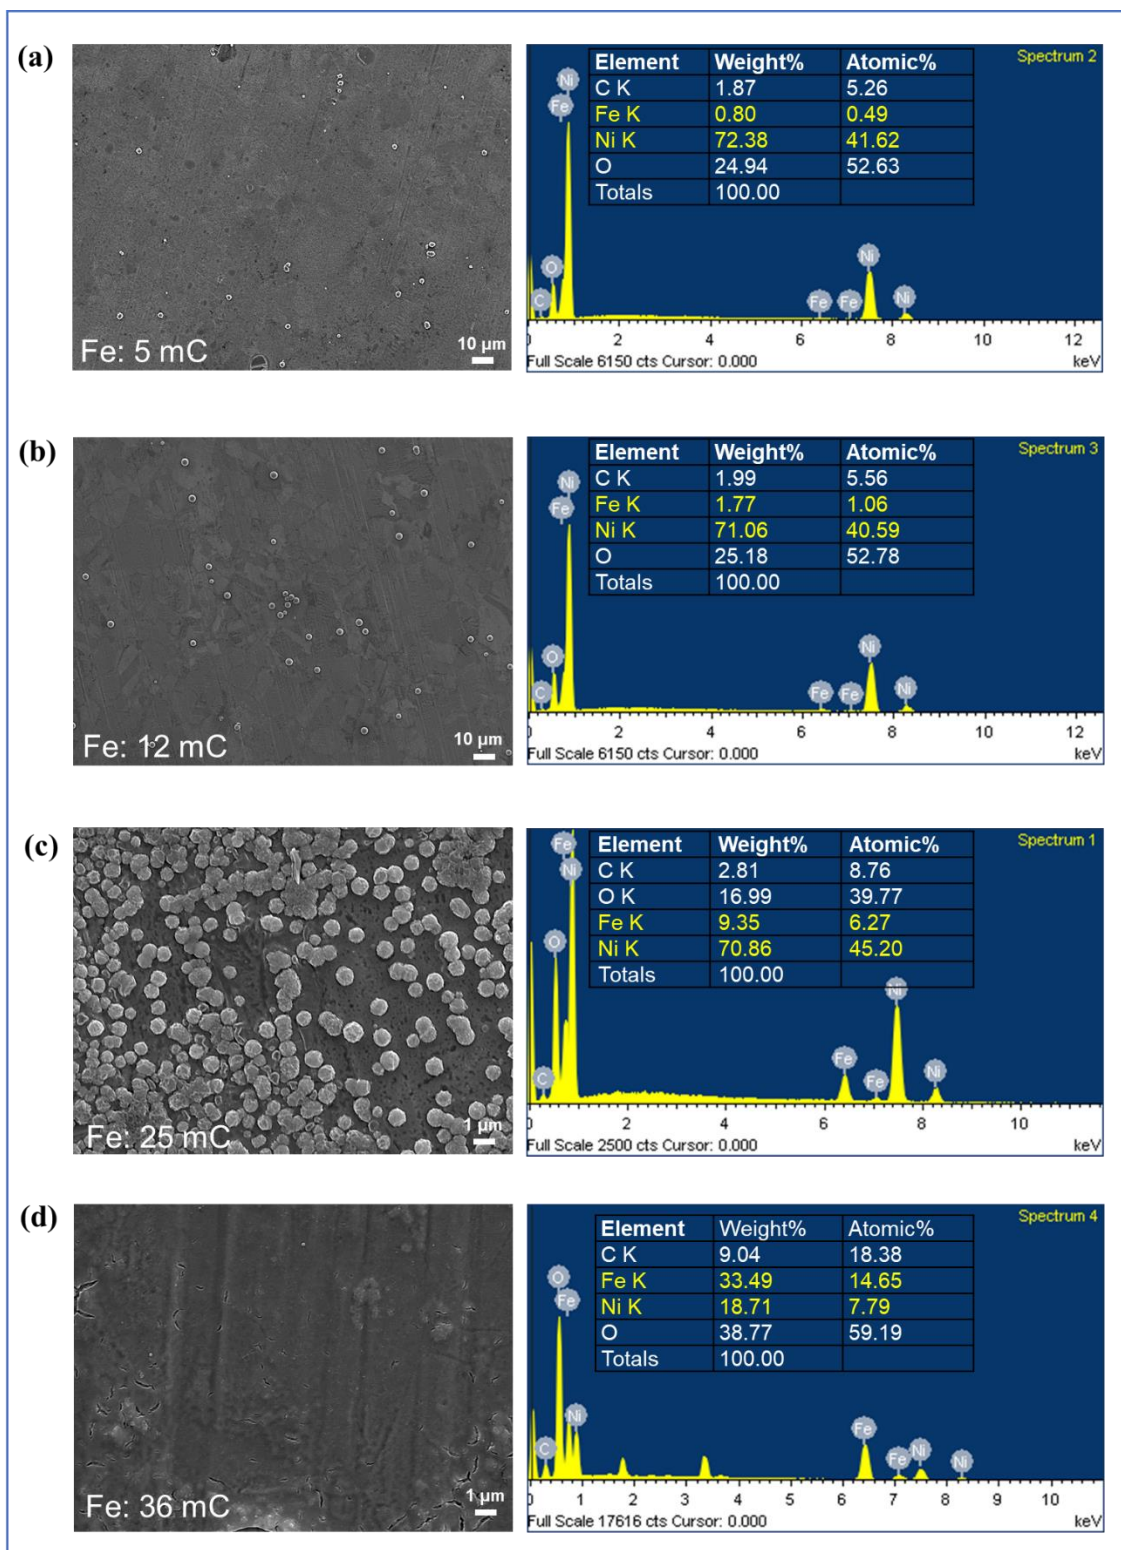

**Figure SI2.** SEM micrography and EDS analysis of thermally treated Ni substrate surfaces with **a.** 5 mC cm<sup>-2</sup>, **b.** 12 mC cm<sup>-2</sup>, **c.** 25 mC cm<sup>-2</sup> **d.** 36 mC cm<sup>-2</sup> Fe load.

**Table SI1.-** EDS analysis of the Ni films after different Fe electrodeposited charges.

|         | 5 mC cm <sup>-2</sup> | 12 mC cm <sup>-2</sup> | 25 mC cm <sup>-2</sup> | 36 mC cm <sup>-2</sup> |
|---------|-----------------------|------------------------|------------------------|------------------------|
| Element | at.-%                 | at.-%                  | at.-%                  | at.-%                  |
| C K     | 5.26                  | 5.56                   | 8.76                   | 18.38                  |
| Fe K    | <b>0.49</b>           | <b>1.06</b>            | <b>6.27</b>            | <b>14.65</b>           |
| Ni K    | 41.62                 | 40.59                  | 45.20                  | 7.79                   |
| O       | 52.63                 | 52.78                  | 39.77                  | 59.19                  |

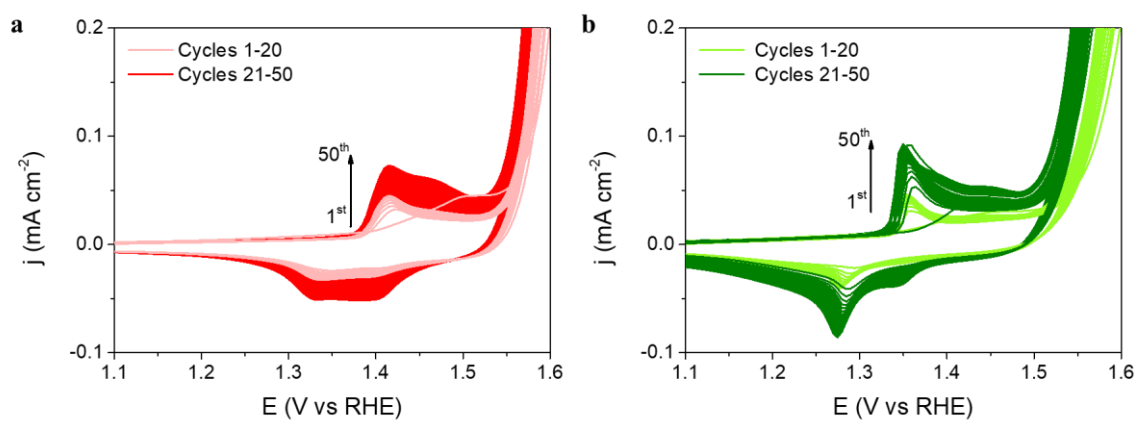

**Figure SI3.** Full cyclic voltammetry treatment performed on **a** bare Ni foil (thermally treated) and **b** Ni foil with 1.06 at-% Fe load.

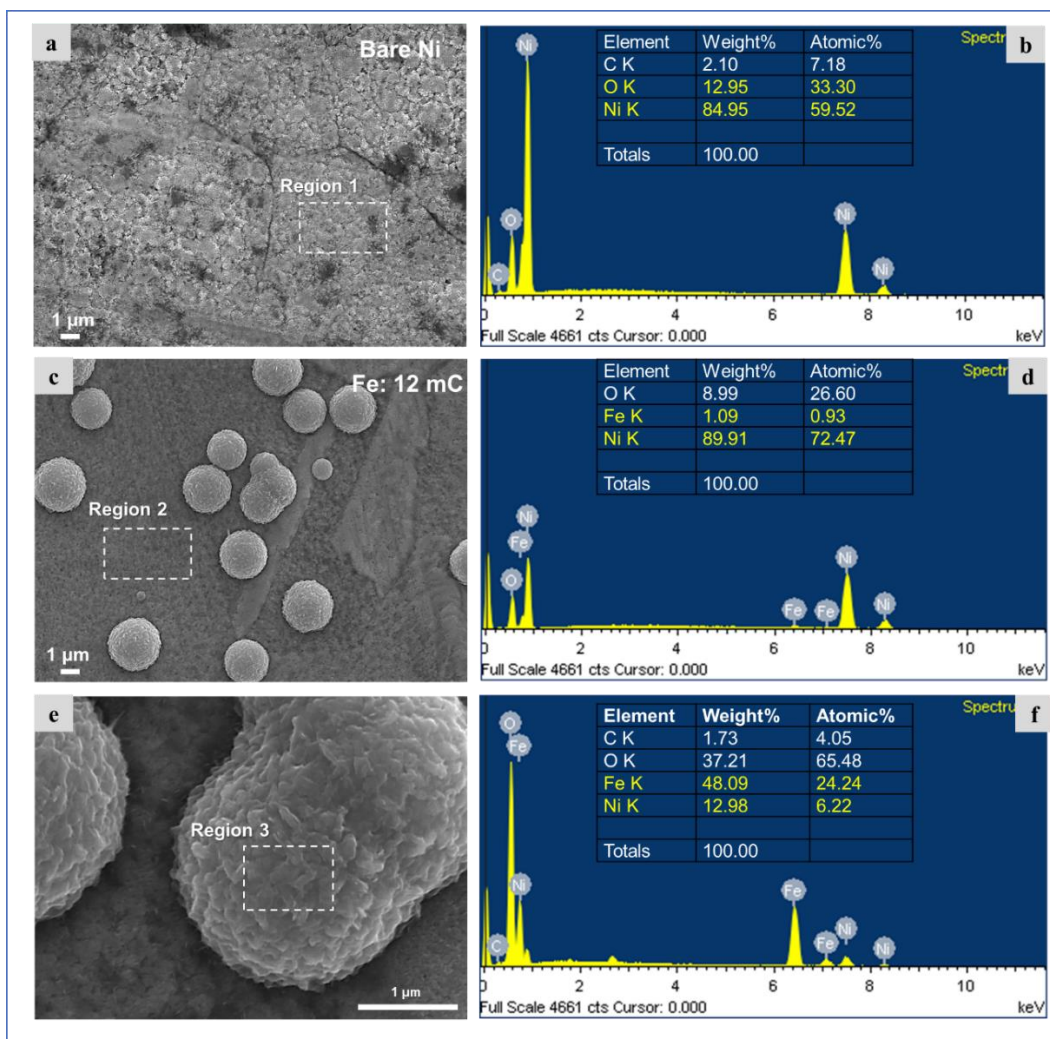

**Figure SI4.** SEM micrographs and EDS analyses of: **a** and **b**: reference Ni substrate after thermal annealing; **b**, **c**, **d** and **f**: two different regions of the Ni -Fe catalyst (1.06 at-% Fe).

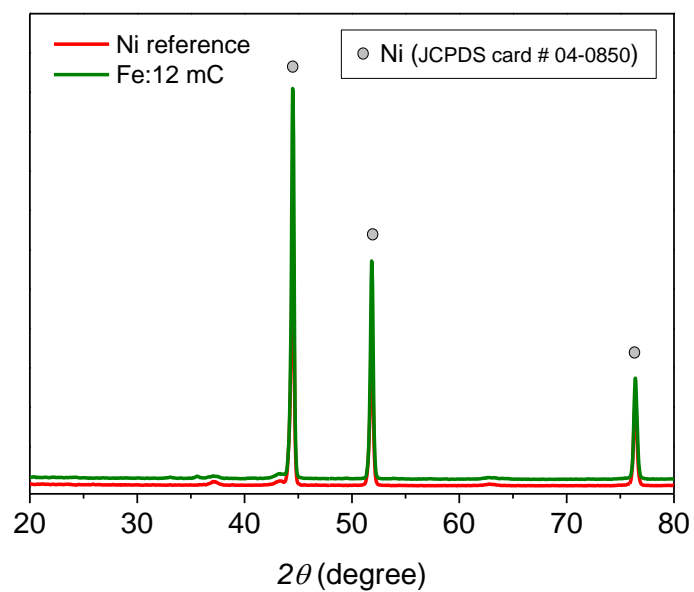

**Figure SI5.** XRD pattern of optimal Ni-Fe catalyst and reference Ni foil annealed.

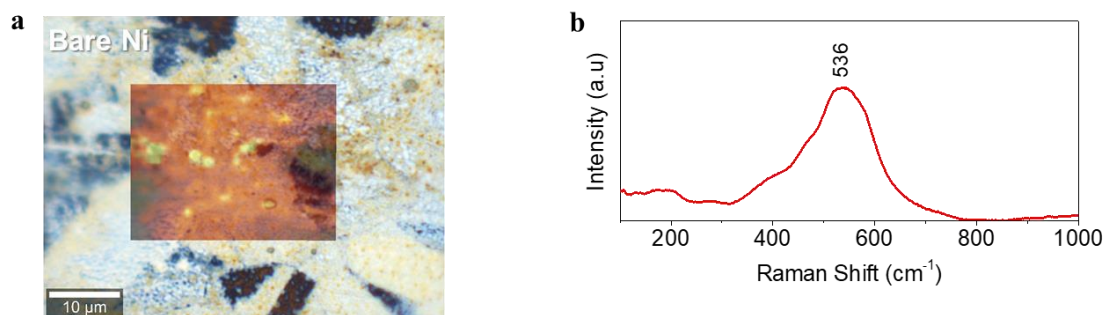

**Figure SI6.** Optical image of the Ni foil surface after annealing, taken as reference and Confocal Multi-Spectral Imaging (CMSI) maps in a selected area. **b.** Raman shift spectra corresponding to the selected area.

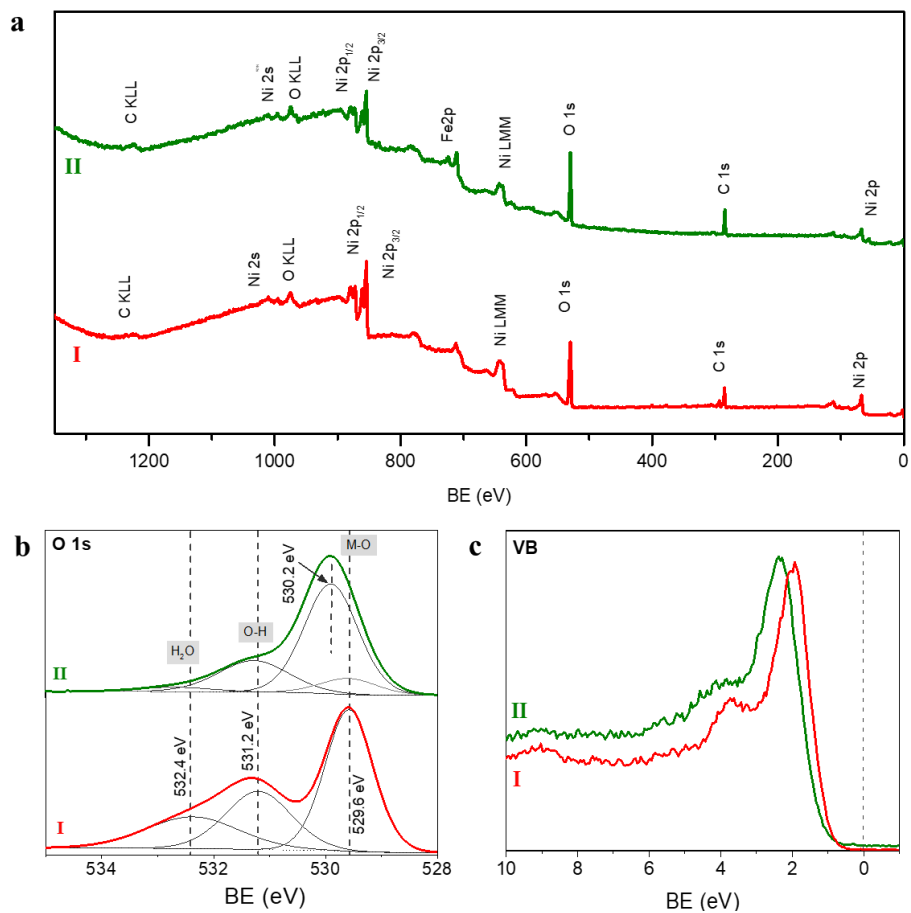

**Figure SI7.** XPS survey spectra of **I** bare, and **II** optimal Fe loaded Ni foil after annealing.

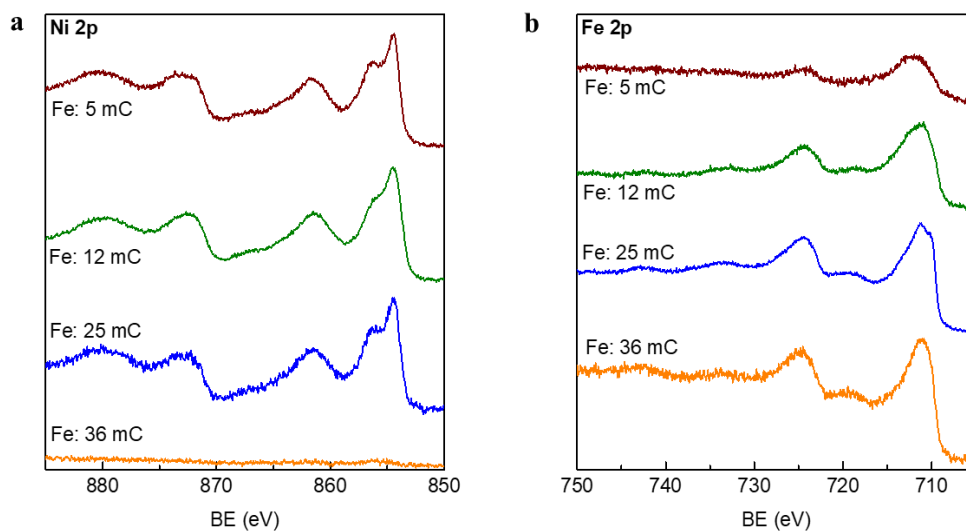

**Figure SI8.** **a** Ni 2p signal and **b** Fe 2p signal in XPS spectra of different samples prepared varying the Fe charge during the electrochemical deposition.

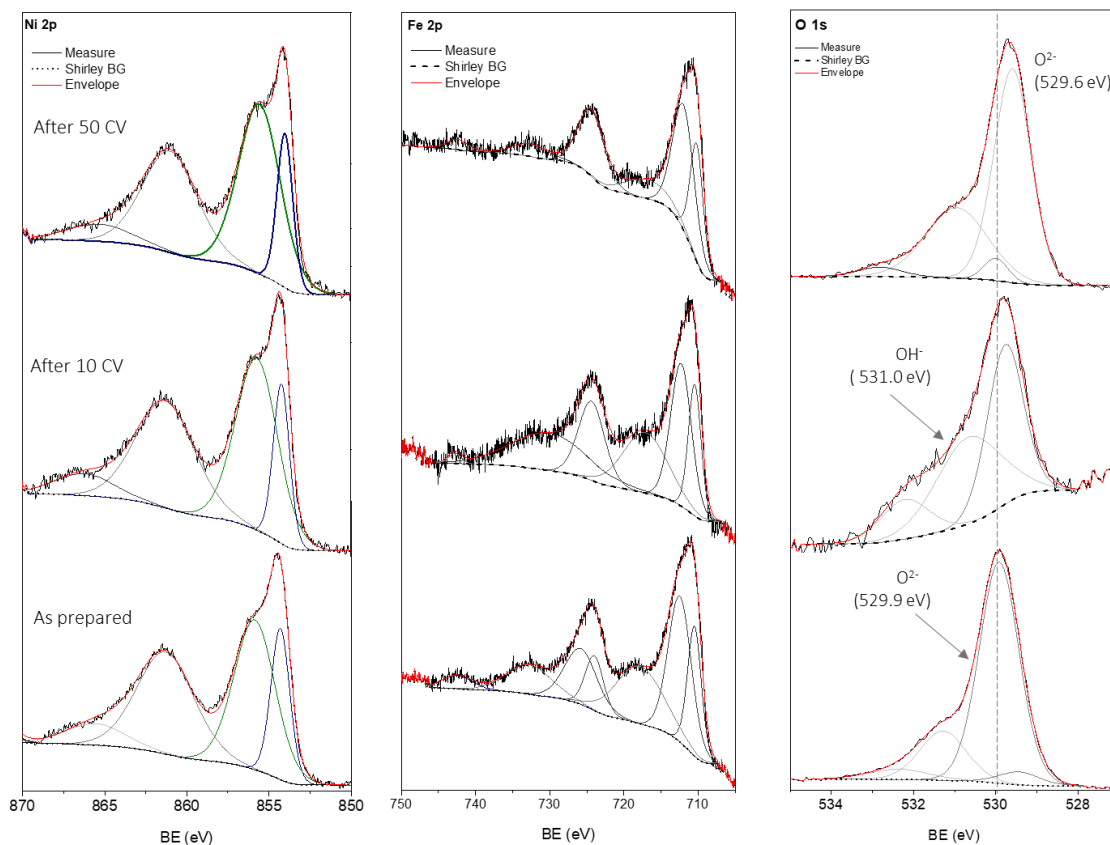

**Figure SI9.** XPS spectra at different stages of the electrochemical activation process for the optimal Ni-Fe electrocatalyst.

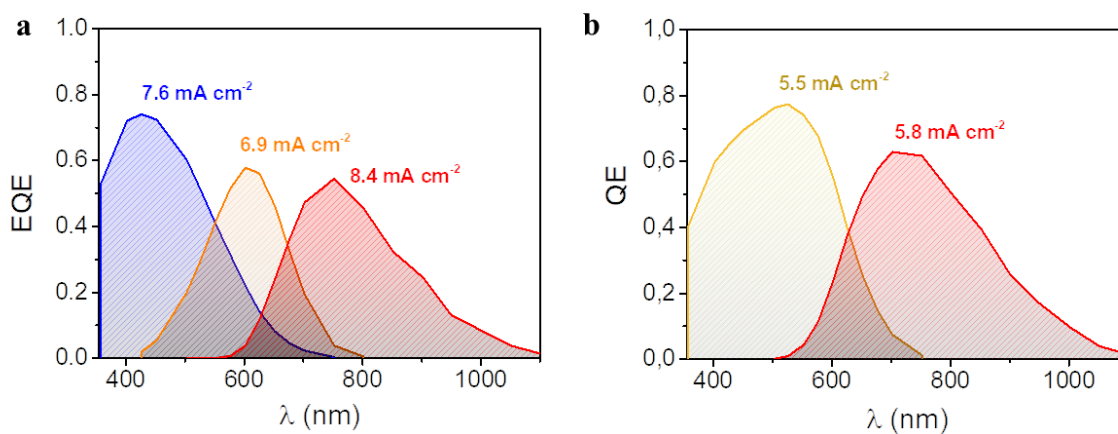

**Figure SI10.** Spectral response (external quantum efficiency, EQE), including individual spectra for each sub-cell, of the photovoltaic devices: (a) PV-1 (b) PV-2. The integrated current density value from the EQE spectrum for each sub-cell is placed in the respective measurement.

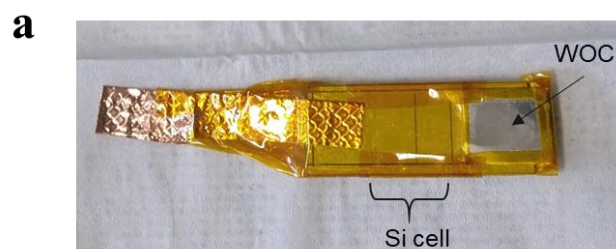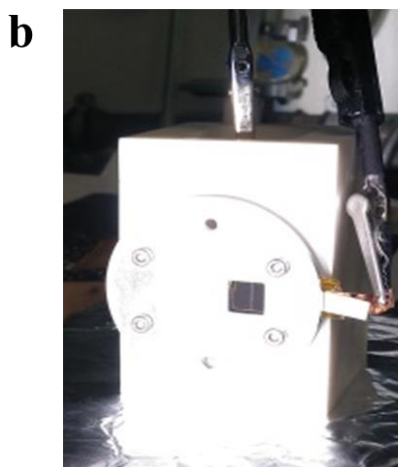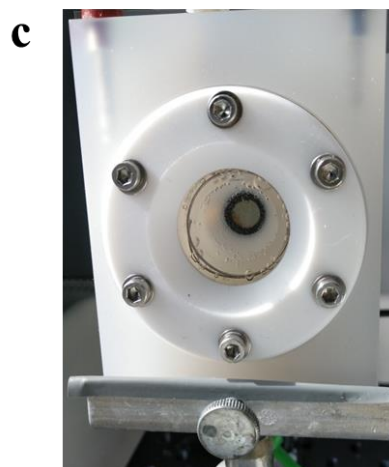

**Figure SI11. a.** Integrated PV-EC photoanode. The water oxidation electrocatalyst (WOC) is coupled to the Si multijunction PV device on the “p-side”, whereas a Cu foil is used to transport the holes from the “n-side” to the counter electrode. The photoelectrochemical setup for characterization of the integrated device: **b.** View from the “back side” of the PV-EC device, showing the photoactive part, **c.** View from the “front side”, showing the gas bubbles produced at the electrode surface.

**Table SI2.** Current density at the theoretical operation point and estimated STH efficiency.

| Photovoltaic device | Ni reference |              | Ni-Fe catalyst                             |              |
|---------------------|--------------|--------------|--------------------------------------------|--------------|
|                     | $j_{op}$     | $\eta_{STH}$ | $j_{op}$<br>( $mA\ cm^{-2}$ ) <sup>2</sup> | $\eta_{STH}$ |
| <i>PV-1</i>         | 5.62         | 6.9%         | 6.09                                       | 7.5%         |
| <i>PV-2</i>         | 5.28         | 6.5%         | 5.33                                       | 6.5%         |



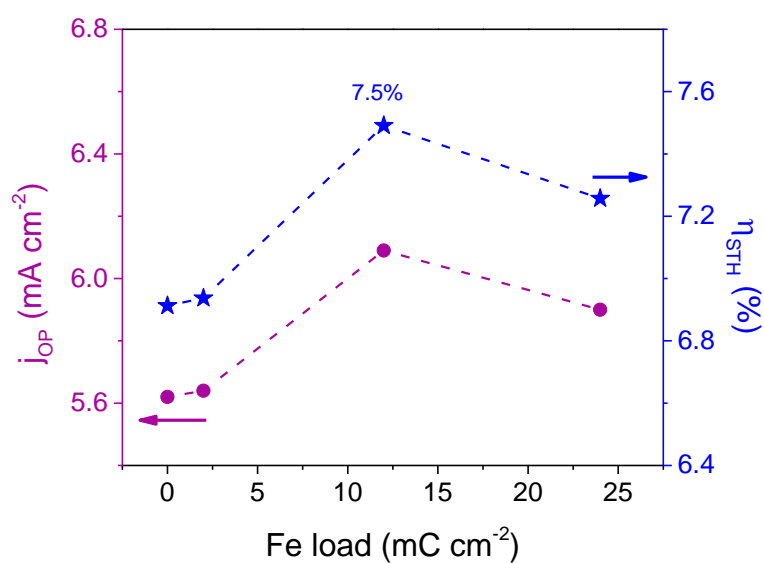

**Figure SI12.** Current density at the operation point (light blue circles) and STH efficiency (dark blue stars), as function of the Fe load on the electrocatalyst, in combination with the PV-1 device.

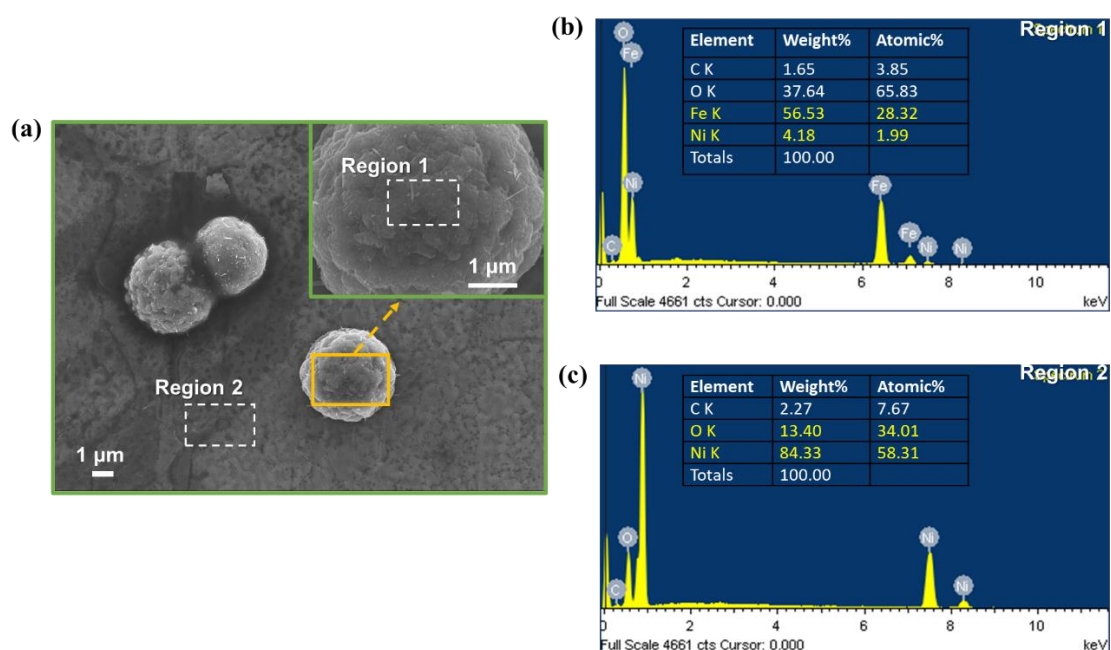

**Figure SI13.** Top view SEM micrograph and EDS analysis of the Ni-Fe electrocatalyst after the long-term (20 h) stability test.
